# Supplementary material for: Growth differentiation factor 15 neutralization does not impact anorexia or survival in lipopolysaccharide-induced inflammation
Source: PubMed Central journal article supplement — iScience. 2021 May 19;24(6):102554. doi: 10.1016/j.isci.2021.102554 (PMC8215224; doi:10.1016/j.isci.2021.102554), 2021-05-19
Supplement: mmc1.pdf [file mmc1.pdf]

## **Supplemental information**

### **Growth differentiation factor 15 neutralization**

### **does not impact anorexia or survival in lipopolysaccharide-induced inflammation**

**Danna M. Breen, Srinath Jagarlapudi, Anita Patel, Chang Zou, Stephanie Joaquim, Xiangping Li, Liya Kang, Jincheng Pang, Katherine Hales, Enida Ziso-Qejvanaj, Nicholas B. Vera, Donald Bennett, Tao He, Matthew Lambert, Kerry Kelleher, Zhidan Wu, Bei B. Zhang, Laura Lin, Randy J. Seeley, and Olivier Bezy**

**Table S1. Health Score Chart For Monitoring Animal’s Health Condition.** Animals were observed and scored on appearance, natural behavior, provoked behavior, and body condition score. Scores from these four criteria were summed into a final cumulative score. Related to Figure 5E and Figure 6C.

| Observation Criteria                | Appearance                                                                       | Natural behavior (in home cage undisturbed)           | Provoked behavior (out of cage, nudge at back)                                          | Body condition score                                    |
|-------------------------------------|----------------------------------------------------------------------------------|-------------------------------------------------------|-----------------------------------------------------------------------------------------|---------------------------------------------------------|
| <b>Possible score range (1–13):</b> | 0–2                                                                              | 0–3                                                   | 0–3                                                                                     | 0–5                                                     |
| <b>Description</b>                  | 2 = Normal                                                                       | 3 = Normal, active                                    | 3 = Quickly moves away                                                                  | 5 = Obese                                               |
|                                     | 1 = Slight hunching, unkempt, dull fur, slight paleness, ears back, squinty eyes | 2 = Slight decrease in activity                       | 2 = Slow to move away or exaggerated response, gait appears slightly off                | 4 = Overweight                                          |
|                                     | 0 = Hunched, piloerection, vocalizing, very pale                                 | 1 = Pronounced decrease in activity, isolated         | 1 = Very slow to move away, abnormal gait, slight lethargy                              | 3 = Normal                                              |
|                                     |                                                                                  | 0 = Immobile, self-mutilations, extreme hyperactivity | 0 = Does not move away, reacts with excessively exaggerated response, complete lethargy | 2 = Thin (vertebral column prominent)                   |
|                                     |                                                                                  |                                                       |                                                                                         | 1 = Emaciated (can see hip bones, individual vertebrae) |
